# Supplementary material
Source: PubMed Central journal article supplement (PMC1360570)

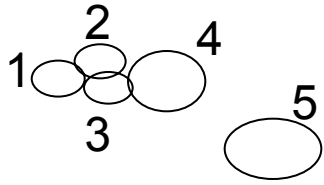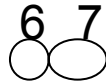

Protein Spots identified by mass spectrometry:

1 = chitinase (VC1952)

2 = extracellular protease (VC2621)

3 = protease PrtV (VCA0223)

4 = protease PrtV (VCA0223)

5 = unprocessed hemolysin (VC0219)

6 = processed hemolysin (VC0219)

7 = processed hemolysin (VC0219)

8 = Hcp (VC1415, VCA0017)

9 = Hcp (VC1415, VCA0017)

10 = N-terminal fragment of hemolysin (VC0219)

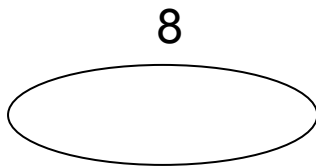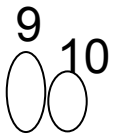

Supplement: pnas_0510322103_4.pdf [file pnas_0510322103_4.pdf]
