# Supplementary material
Source: PubMed Central journal article supplement (PMC1360570)
Supplement: pnas_0510322103_6.pdf [file pnas_0510322103_6.pdf]

|                    |          |         |                                 |   |   |   |   |   |   |   |   |   |   |
|--------------------|----------|---------|---------------------------------|---|---|---|---|---|---|---|---|---|---|
|                    |          |         | -WPTDAAQNGDR.-                  | X | X | X | X | X | X | X | X | X | X |
| VgrG-1             | (Q9KS45) | VC1416  | -DFDGLIENDHTTVIR.-              | X |   |   |   |   |   |   |   |   |   |
|                    |          |         | -ESDIDFLHR.-                    | X |   |   |   |   |   |   |   |   |   |
|                    |          |         | -HAHTATGQSNEPLLR.-              | X |   |   |   |   |   |   |   |   |   |
|                    |          |         | -TQAEVSEVQLK.-                  | X |   |   |   |   |   |   |   |   |   |
|                    |          |         | -TQAEVSEVQLKDYSFK.-             | X |   |   |   |   |   |   |   |   |   |
|                    |          |         | -TYHATNTPPYTLPEHK.-             | X |   |   |   |   |   |   |   |   |   |
|                    |          |         | -VSNLTAEQM*VDK.-                | X |   |   |   |   |   |   |   |   |   |
|                    |          |         | -VSNLTAEQMVDKR.-                | X |   |   |   |   |   |   |   |   |   |
|                    |          |         | -VSQGWAGSQYGFIAIPR.-            | X |   |   |   |   |   |   |   |   |   |
|                    |          |         | -VWVNEAGTEIHVK.-                | X |   |   |   |   |   |   |   |   |   |
|                    |          |         | -YEVQLASR.-                     | X |   |   |   |   |   |   |   |   |   |
|                    |          |         | -YKDDVNGAAFSQIR.-               | X |   |   |   |   |   |   |   |   |   |
|                    |          |         | -YQHFDAPGR.-                    | X |   |   |   |   |   |   |   |   |   |
| VgrG-3             | (Q9KN42) | VCA0123 | -DGQVVQQINGIVR.-                | X |   |   |   |   |   |   |   |   |   |
|                    |          |         | -GFEGQESLSDSVWR.-               | X |   |   |   |   |   |   |   |   |   |
|                    |          |         | -HTLLFTDSSDSQPK.-               | X |   |   |   |   |   |   |   |   |   |
|                    |          |         | -IALDSSHEV GASLQHK.-            | X |   |   |   |   |   |   |   |   |   |
|                    |          |         | -IAVEAGKEISLK.-                 | X |   |   |   |   |   |   |   |   |   |
|                    |          |         | -M*LAQAKPVAELVQPDIAASM*QSGAAR.- | X |   |   |   |   |   |   |   |   |   |
|                    |          |         | -NQHLTVEGEVR.-                  | X |   |   |   |   |   |   |   |   |   |
|                    |          |         | -TTAQVSHTELKDYSEFK.-            | X |   |   |   |   |   |   |   |   |   |
|                    |          |         | -TYHATNTAPYALPDHK.-             | X |   |   |   |   |   |   |   |   |   |
|                    |          |         | -VAQEWAGSQYGSMAIPR.-            | X |   |   |   |   |   |   |   |   |   |
|                    |          |         | -VDGLEDESLVVR.-                 | X |   |   |   |   |   |   |   |   |   |
| Putative chitinase | (Q9KLD5) | VCA0811 | -AGQLNGDQFVVPYGTNPIYLK.-        |   |   |   | X | X | X | X | X | X | X |
|                    |          |         | -ANQWSYALATK.-                  |   | X |   | X | X | X | X | X | X | X |
|                    |          |         | -IASAESALAAALDEQTADR.-          |   | X | X | X | X | X | X | X | X | X |
|                    |          |         | -IASAESALAAALDEQTADRWWK.-       |   | X | X | X | X | X | X | X | X | X |
|                    |          |         | -YYITKPNWNPQPLSR.-              |   |   | X | X |   |   | X |   |   |   |
| HA protease        | (P24153) |         | -DM*SGGINEAFSDIAGEAAEYFM*R.-    | X | X | X | X | X | X | X | X | X | X |
|                    |          |         | -GNVDWIVGADIFK.-                | X |   | X | X | X | X | X | X | X | X |
|                    |          |         | -GYSNYSVTLR.-                   | X |   |   |   |   | X | X |   |   |   |
| Putative chitinase | (Q9KTW1) | VC0769  | -ADIAAAEQAK.-                   | X | X | X |   | X |   |   | X | X | X |
|                    |          |         | -ANAIVDAIEPGLATNPDNVK.-         | X | X | X | X |   | X | X | X | X | X |
|                    |          |         | -DNISDNPLALEEWQALVHVR.-         | X |   | X | X |   |   |   | X | X | X |
|                    |          |         | -VYNSGDKVSYK.-                  | X | X | X |   |   |   |   | X | X | X |
| VgrG-2             | (Q9KNE7) | VCA0018 | -LDCSSEIGGSQQK.-                | X |   |   |   |   |   |   |   |   |   |
|                    |          |         | -LPEPIPYNALAGTM*DTPYIHGLTYR.-   | X |   |   |   |   |   |   |   |   |   |
|                    |          |         | -M*AELPQGVDK.-                  | X |   |   |   |   |   |   |   |   |   |
| Chitinase          | (Q9KQP6) | VC1952  | -ATDAAGTSVTSSAAAISVVEQAQK.-     |   |   |   | X | X |   | X | X | X | X |
|                    |          |         | -ATDAAGTSVTSSAAAISVVEQAQKK.-    | X | X | X | X | X | X | X | X | X | X |

“X” indicates that a fragment of a particular protein was identified in a given sample by ESI-LC-MS/MS (Electrospray ionization liquid chromatography – tandem mass spectrometry); “empty” indicates that a protein fragment could not be identified.
