# Supplementary material
Source: PubMed Central journal article supplement (PMC1360570)

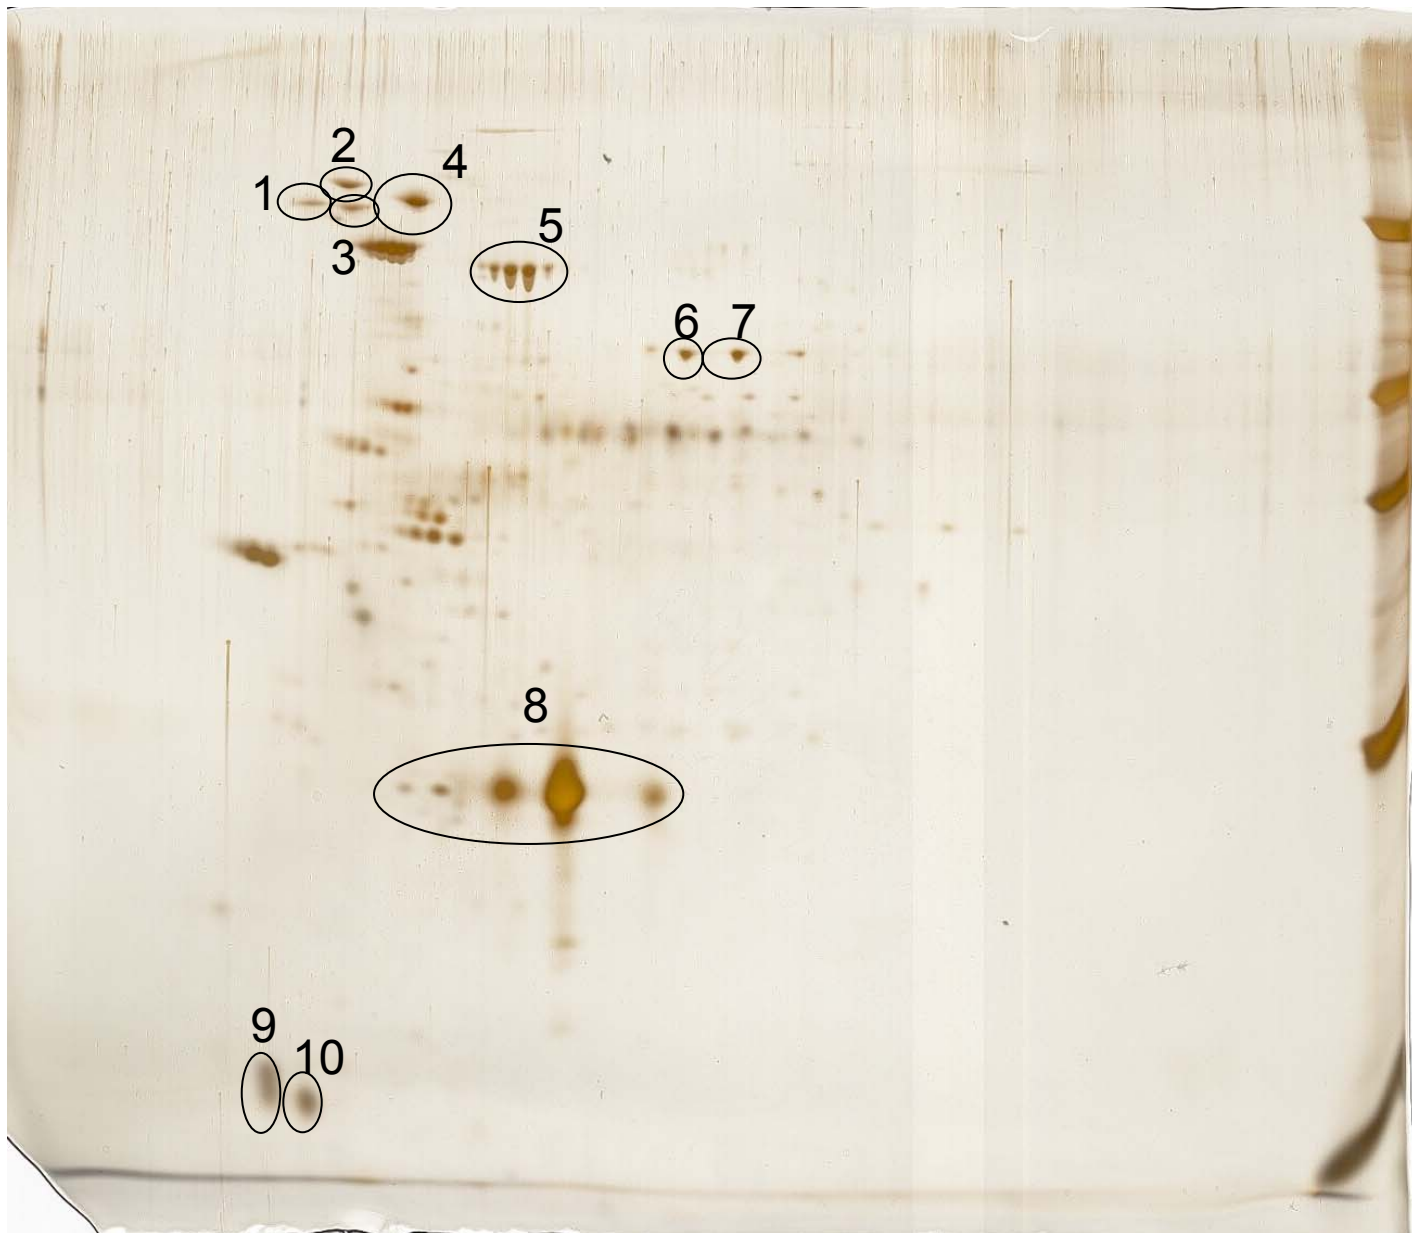

MW (kD)

94

60

43

29

14

Supplement: pnas_0510322103_1.pdf [file pnas_0510322103_1.pdf]

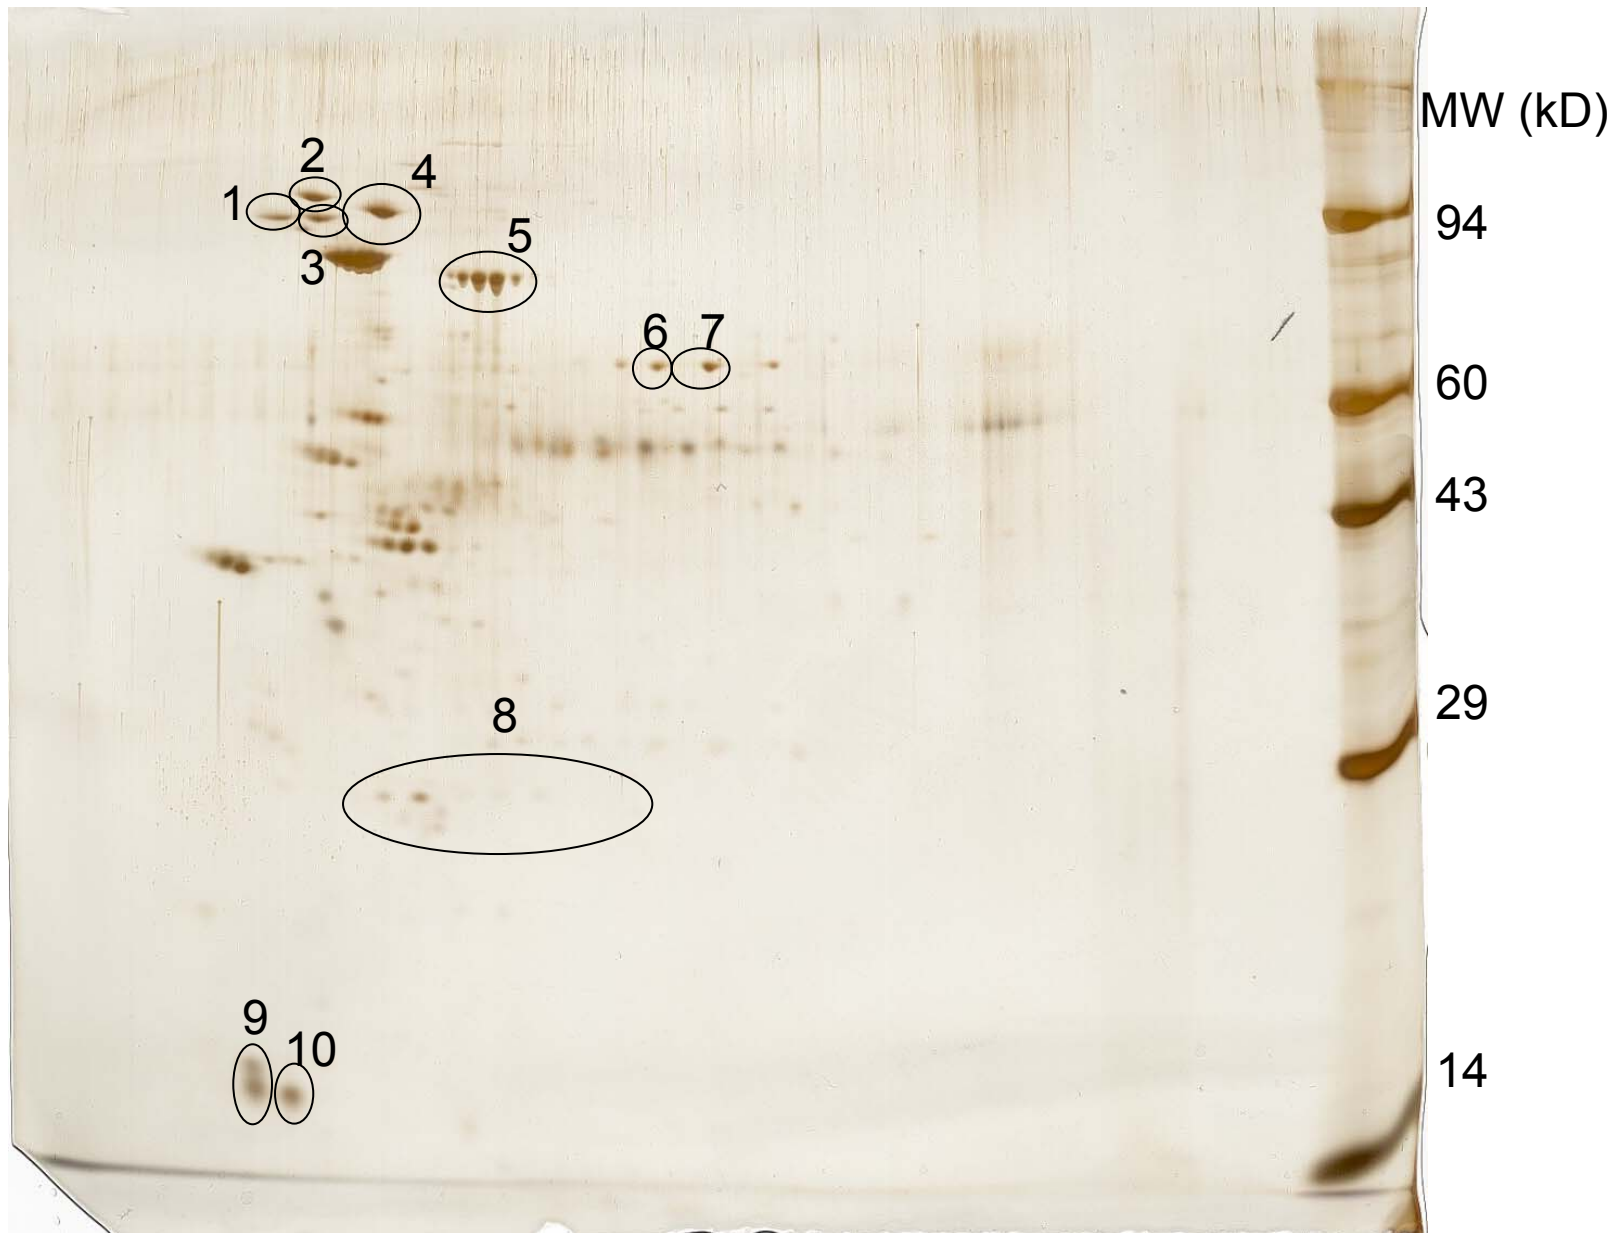

Supplement: pnas_0510322103_2.pdf [file pnas_0510322103_2.pdf]

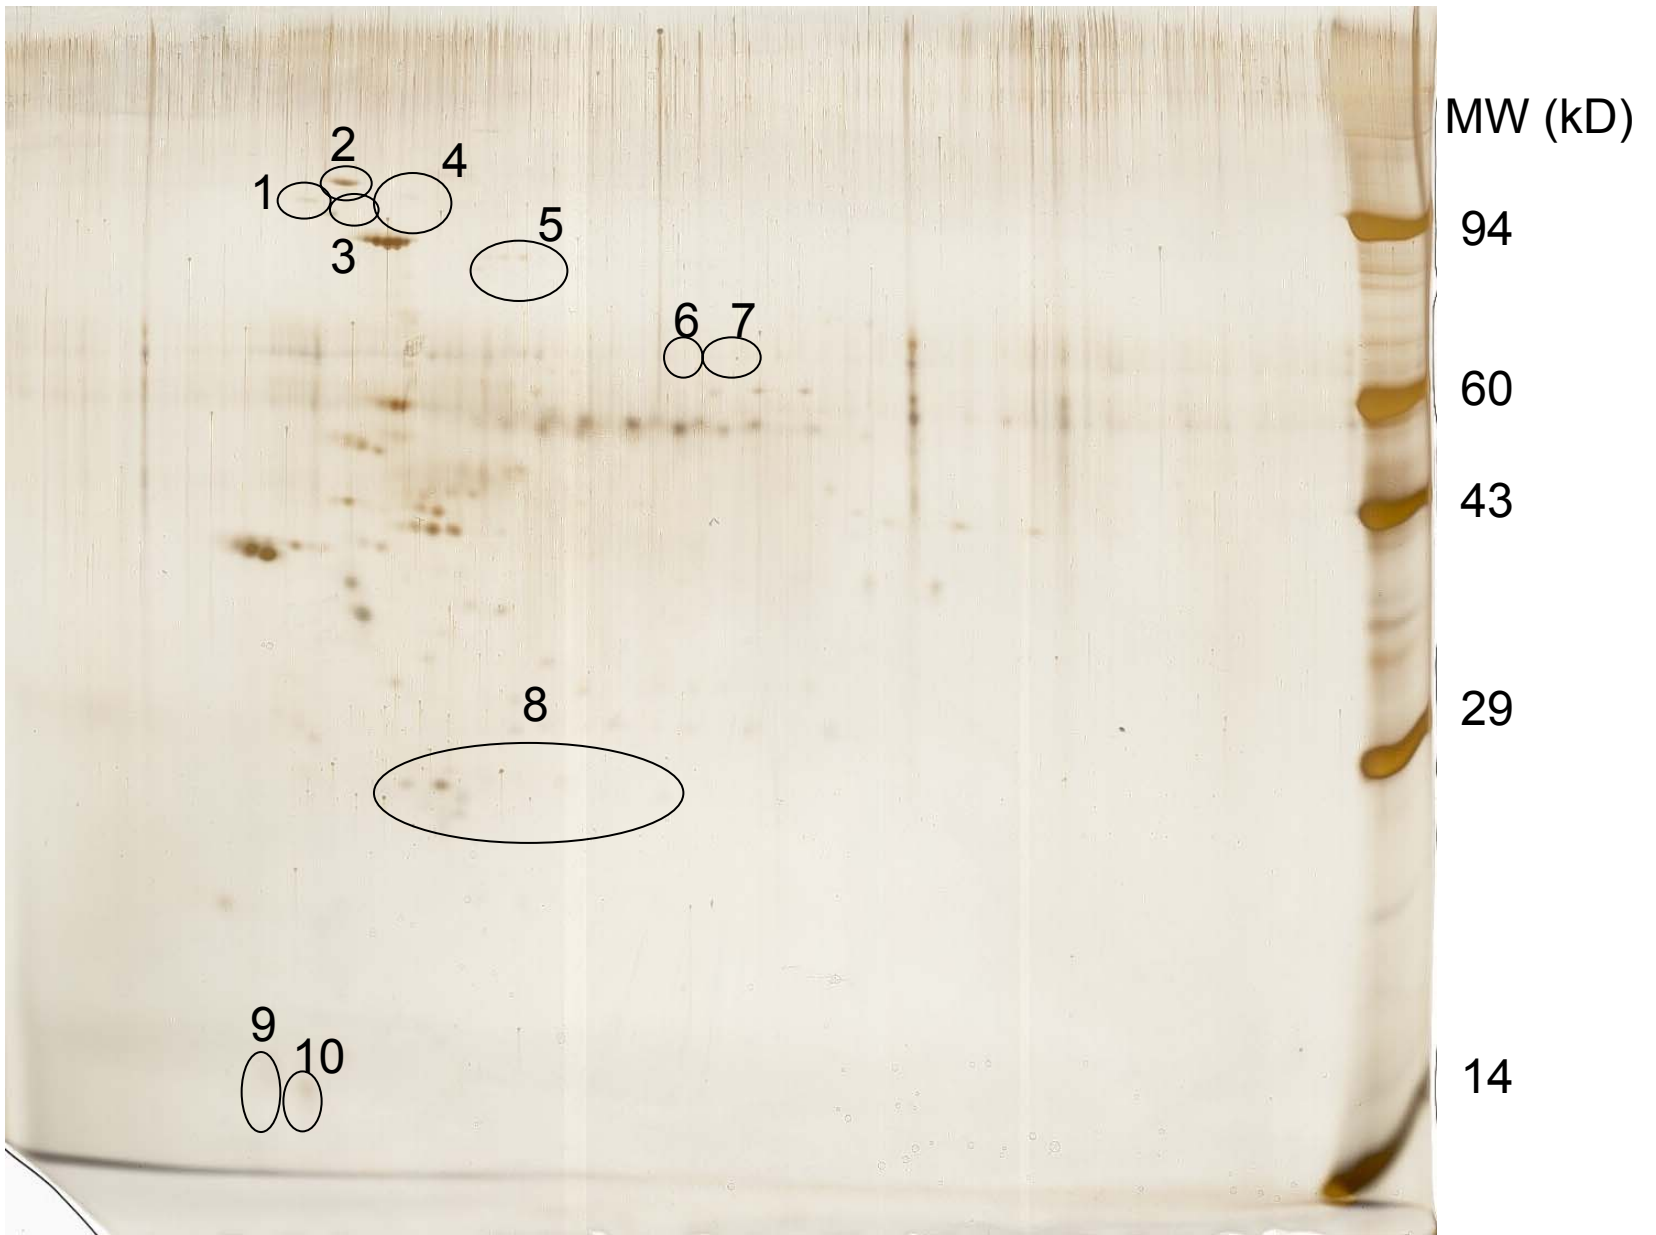

Supplement: pnas_0510322103_3.pdf [file pnas_0510322103_3.pdf]

V52 V52  $\Delta$ vasK  
SCE223 SCE223  $\Delta$ vasK  
SCE226 SCE226  $\Delta$ vasK

MW  
(kD)

120 —  
80 —  
50 —  
40 —  
30 —  
25 —  
20 —  
10 —

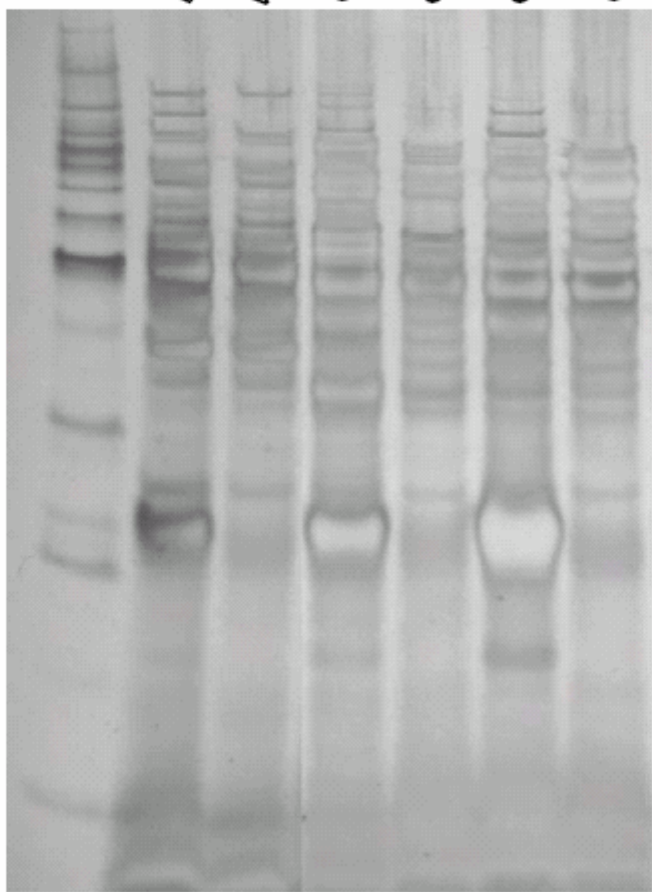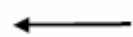

Hcp

Supplement: pnas_0510322103_5.pdf [file pnas_0510322103_5.pdf]
